# Supplementary material for: Urinary microRNA can be concentrated, dried on membranes and stored at room temperature in vacuum bags
Source: PeerJ. 2015 Jul 14;3:e1082. doi: 10.7717/peerj.1082 (PMC4512770; doi:10.7717/peerj.1082)
Supplement: Table S1 — The CT values of U6, miR-16 and miR-21 before and after storage. [file peerj-03-1082-s001.xlsx]

## Sheet: Sheet1
	Well	Fluor	Target	Sample	Ct	Ct Mean	Ct_U6	△Ct	log10(detal ct)
	A05	SYBR	miR-16	1	27.76	27.2367	21.1667	6.07	0.783189
	A06	SYBR	miR-16	1	26.94
	A07	SYBR	miR-16	1	27.01
	B05	SYBR	miR-16	2	26.63	26.7533	21.1033	5.65	0.752048
	B06	SYBR	miR-16	2	27.18
	B07	SYBR	miR-16	2	26.45
	C05	SYBR	miR-16	3	27.43	27.725	21.72	6.005	0.778513
	C06	SYBR	miR-16	3	28.02
	C07	SYBR	miR-16	3	28.71
	D05	SYBR	miR-16	4	26.56	26.6067	21.865	4.74167	0.675931
	D06	SYBR	miR-16	4	26.61
	D07	SYBR	miR-16	4	26.65
	E05	SYBR	miR-16	5	27.12	27.0933	21.2767	5.81667	0.764674
	E06	SYBR	miR-16	5	26.95
	E07	SYBR	miR-16	5	27.21
	F05	SYBR	miR-16	6	26.44	26.5333	21.2	5.33333	0.726999
	F06	SYBR	miR-16	6	26.35
	F07	SYBR	miR-16	6	26.81
	G05	SYBR	miR-16	7	27.15	27.3033	21.2667	6.03667	0.780797
	G06	SYBR	miR-16	7	27.38
	G07	SYBR	miR-16	7	27.38
	H05	SYBR	miR-16	8	27.38	27.64	21.3967	6.24333	0.795417
	H06	SYBR	miR-16	8	28.84
	H07	SYBR	miR-16	8	26.7
	A09	SYBR	miR-21	1	32.83	31.7733	21.1667	10.6067	1.02558
	A10	SYBR	miR-21	1	31.73
	A11	SYBR	miR-21	1	30.76
	B09	SYBR	miR-21	2	31.53	31.765	21.1033	10.6617	1.02783
	B10	SYBR	miR-21	2	32
	B11	SYBR	miR-21	2	31.07
	C09	SYBR	miR-21	3	32.51	32.865	21.72	11.145	1.04708
	C10	SYBR	miR-21	3	33.65
	C11	SYBR	miR-21	3	33.22
	D09	SYBR	miR-21	4	33.79	32.62	21.865	10.755	1.03161
	D10	SYBR	miR-21	4	31.68
	D11	SYBR	miR-21	4	33.56
	E09	SYBR	miR-21	5	31.77	31.9567	21.2767	10.68	1.02857
	E10	SYBR	miR-21	5	32.26
	E11	SYBR	miR-21	5	31.84
	F09	SYBR	miR-21	6	31.69	32.1833	21.45	10.7333	1.03073
	F10	SYBR	miR-21	6	32.43
	F11	SYBR	miR-21	6	32.43
	G09	SYBR	miR-21	7	32.28	32.7067	21.2667	11.44	1.05843
	G10	SYBR	miR-21	7	32.36
	G11	SYBR	miR-21	7	33.48
	H09	SYBR	miR-21	8	32.6	32.2867	21.3967	10.89	1.03703
	H10	SYBR	miR-21	8	32.24
	H11	SYBR	miR-21	8	32.02
	Well	Fluor	Target	Sample	Ct	Ct Mean
	A01	SYBR	U6	1	20.88	21.1667
	A02	SYBR	U6	1	21.72
	A03	SYBR	U6	1	20.9
	B01	SYBR	U6	2	20.98	21.1033
	B02	SYBR	U6	2	21.31
	B03	SYBR	U6	2	21.02
	C01	SYBR	U6	3	22.03	21.72
	C02	SYBR	U6	3	24.19
	C03	SYBR	U6	3	21.41
	D01	SYBR	U6	4	22.36	21.865
	D02	SYBR	U6	4	22.23
	D03	SYBR	U6	4	21.5
	E01	SYBR	U6	5	21.21	21.2767
	E02	SYBR	U6	5	21.25
	E03	SYBR	U6	5	21.37
	F01	SYBR	U6	6	21.96	21.195
	F02	SYBR	U6	6	21.2
	F03	SYBR	U6	6	21.19
	G01	SYBR	U6	7	21.35	21.2667
	G02	SYBR	U6	7	20.98
	G03	SYBR	U6	7	21.47
	H01	SYBR	U6	8	21.73	21.3967
	H02	SYBR	U6	8	21.1
	H03	SYBR	U6	8	21.36
	before storage
	after storage
